# Supplementary material for: Environmentally benign synthesis of virus-templated, monodisperse, iron-platinum nanoparticles
Source: Royal Society of Chemistry journal article supplement (doi:10.1039/b906847c), 2009-01-01
Supplement: b906847c.pdf [file b906847c.pdf]

## **Supplementary Information**

### **Environmentally benign synthesis of virus-templated, monodisperse, iron-platinum nanoparticles.**

**Sachin N. Shah, Nicole F. Steinmetz,<sup>a</sup> Alaa A. A. Aljabali, George P. Lomonossoff and David. J. Evans\***

Department of Biological Chemistry, John Innes Centre, Norwich Research Park,  
Colney, Norwich, NR4 7UH (United Kingdom)

Fax: +44-(0)1603-450018

E-mail: [dave.evans@bbsrc.ac.uk](mailto:dave.evans@bbsrc.ac.uk)

<sup>a</sup> Present address: Department of Cell Biology and Centre of Integrated Molecular Biosciences, The Scripps Research Institute, 10550 North Torrey Pines Road, La Jolla, CA 92037, USA.

## **Instrumentation**

- Transmission Electron Microscope (TEM) – Carbon-coated copper EM grids (400 mesh, Agar Scientific) on TEM JEOL 1200EX.
- Selected Area Electron Diffraction (SAED) – Philips 420 TEM at working voltage of 120 KV.
- Energy dispersive X-ray Spectroscopy (EDXS) – OXFORD INCA Energy 200Premium.
- Nanoparticle Tracking Analysis – NanoSight VM 10 instrument.
- Dynamic Light Scattering (DLS) – DynaPro Titan, Wyatt Technology Corporation.
- Zeta Potential – Malvern Instruments Zetasizer Nano.

## Cloning Procedure

Oligonucleotides encoding the peptide of interest, flanked by appropriate restriction sites (*NheI* and *AatII*), were cloned into the CPMV RNA2-based vector, pCP2.<sup>[1]</sup> In a second cloning step the chimaeric sequence was cloned *via* the enzymes *Bam*HI and *Eco*RI into the CPMV RNA-2 based binary vector pBinP-NS1.<sup>[2]</sup> The resulting recombinant pBinP-NS1-based clone, termed, pBinP-NS1-FEPT, was used to agroinoculate cowpea (*Vigna unguiculata*) plants in the presence of the full-length clone of RNA-1, pBinP-S1NT. Plants were maintained in a greenhouse as previously described.<sup>[2]</sup>

## Chimaera Virus Propagation and Purification

To scale-up the production of virus particles, plant sap or purified virions were used to inoculate further cowpea plants.<sup>[3]</sup> Virus particles were purified and the concentration of virions determined by Bradford assay or spectrophotometrically as previously described.<sup>[4]</sup>

## FePt coating of CPMV<sub>FePt</sub> Chimaera

Chimaeric CPMV<sub>FePt</sub> (10 mg/ml, 200  $\mu$ mol) in 10 mM sodium phosphate buffer of pH 7 was treated with 200  $\mu$ l of a 1:1 mixture of 0.05 mol dm<sup>-3</sup> FeCl<sub>3</sub> and 0.05 mol dm<sup>-3</sup> H<sub>2</sub>PtCl<sub>6</sub> and 200  $\mu$ l of 0.1 mol dm<sup>-3</sup> NaBH<sub>4</sub>, in 10 mM sodium phosphate buffer pH 7, added with constant stirring over 10 min at room temperature. After a further 3 days stirring at ambient temperature the FePt-coated CPMV<sub>FePt</sub> nanoparticles were then recovered from the reaction mixture by centrifugation at 14000 r.p.m. for 10 min, the supernatant containing FePt-coated CPMV<sub>FePt</sub> nanoparticles was passed through 100 K Millipore cut-off columns and washed several times with Mill-Q water. The recovery of purified FePt-coated CPMV<sub>FePt</sub> nanoparticles was approximately 55 % based on initial virus concentration. Control experiments with wild-type CPMV were performed under identical conditions.

### Dynamic light scattering.

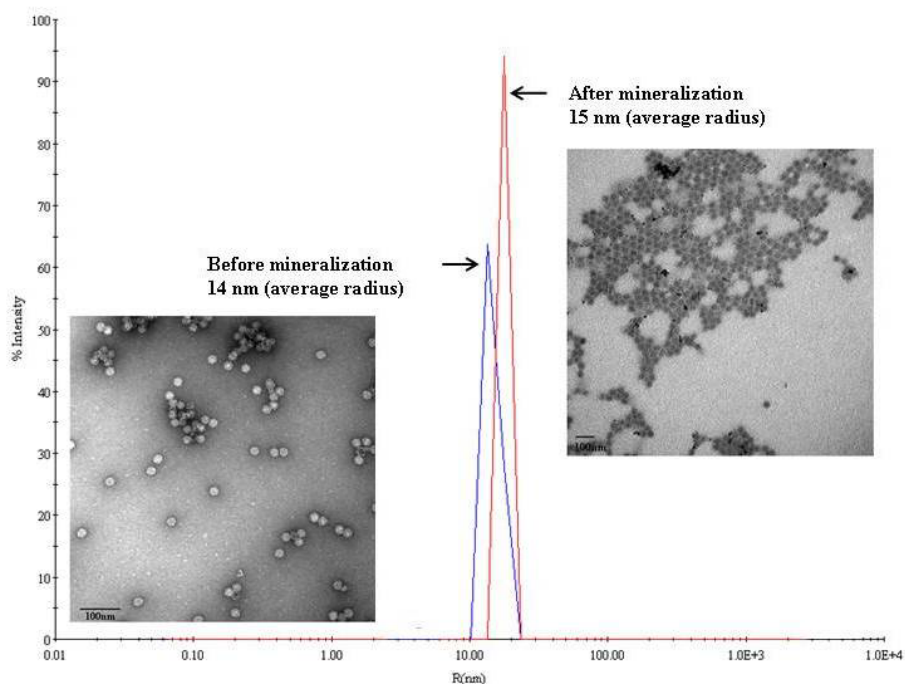

### Supporting Figure 1. Dynamic light scattering.

Dynamic light scattering (DLS) comparing CPMV<sub>FePt</sub> chimaera (blue line) and FePt-coated CPMV<sub>FePt</sub> particles (red line). Average radius increases by 1 nm after mineralization.

### Zeta Potential Measurement.

1 ml of 0.05 mg/ml FePt-coated CPMV<sub>FePt</sub> particles dispersed in 10 mM sodium phosphate buffer pH 7.2 was prepared. Zeta cells were equilibrated at 21 °C for 2 minutes before recording three measurements each of ten runs. Data was collected with automatic attenuation selected and analysed using the Smoluchowski module.

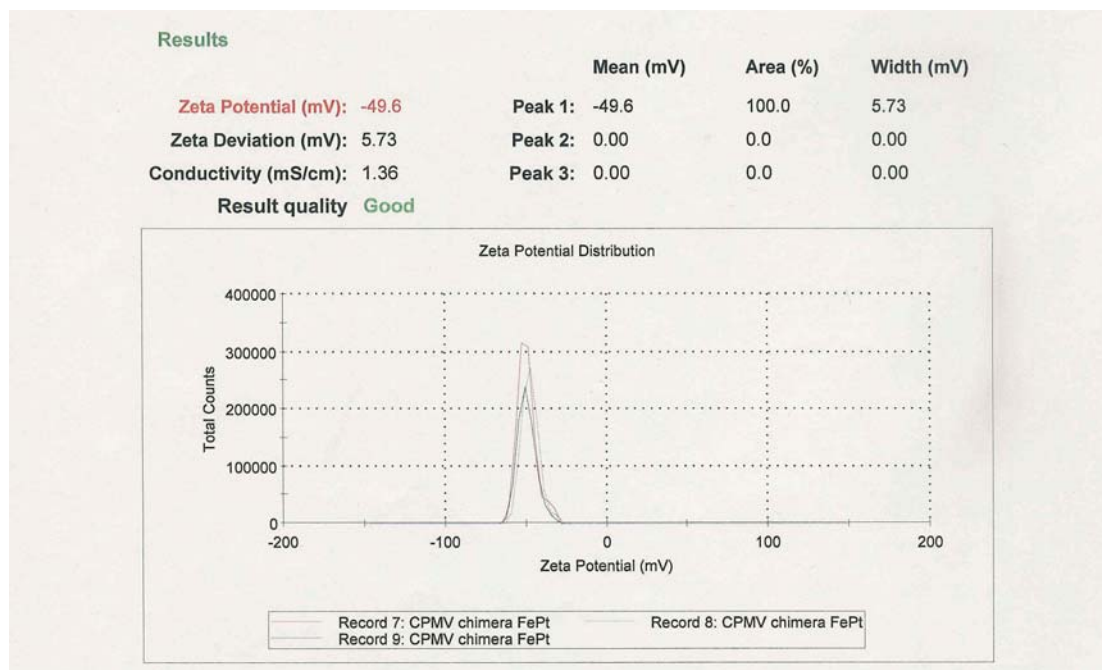

**Supporting Figure 2. Zeta potential measurement for FePt-coated CPMV<sub>FePt</sub> particles suspended in buffer at pH 7.2.**

## References

- [1] J. T. Dessens and G. P. Lomonossoff, *J. Gen. Virol.*, 1993, **74**, 889-892.
- [2] L. Liu and G. P. Lomonossoff, *J. Virol. Meth.*, 2002, **105**, 343-348.
- [3] J. Wellink, *Methods Mol. Biol.*, 1998, **81**, 205-209.
- [4] N. F. Steinmetz, G. P. Lomonossoff and D. J. Evans, *Langmuir*, 2006, **22**, 3488-3490.
